# Supplementary material
Source: MDPI journal article supplement (https://www.mdpi.com/2076-3417/9/18/3773)
Supplement: s1 [file s1]

1

## Supplementary Data

2

Table 1. Experimental central composite design (CCD) runs in design Design-Expert 7.1 and

3

corresponding response (results).

| Run | Factor 1<br>Crude oil<br>(%) | Factor 2<br>Inoculation load Log<br>CFU | Factor 3<br>Temperature | Factor<br>4<br>pH | Response<br>Rhamnolipid production (RE<br>mg/ml) |
|-----|------------------------------|-----------------------------------------|-------------------------|-------------------|--------------------------------------------------|
| 1   | 1                            | 5                                       | 20                      | 5                 | 0.6                                              |
| 2   | 2                            | 6.5                                     | 42.5                    | 6.5               | 1.5                                              |
| 3   | 1                            | 8                                       | 35                      | 8                 | 1.5                                              |
| 4   | 4                            | 6.5                                     | 27.5                    | 6.5               | 2.4                                              |
| 5   | 2                            | 3.5                                     | 27.5                    | 6.5               | 1.4                                              |
| 6   | 2                            | 6.5                                     | 27.5                    | 6.5               | 2                                                |
| 7   | 2                            | 6.5                                     | 27.5                    | 6.5               | 2                                                |
| 8   | 3                            | 5                                       | 20                      | 5                 | 2                                                |
| 9   | 3                            | 8                                       | 35                      | 5                 | 2.2                                              |
| 10  | 0                            | 6.5                                     | 27.5                    | 6.5               | 0                                                |
| 11  | 3                            | 8                                       | 35                      | 8                 | 2.4                                              |
| 12  | 1                            | 5                                       | 20                      | 8                 | 0.6                                              |
| 13  | 2                            | 9.5                                     | 27.5                    | 6.5               | 2.2                                              |
| 14  | 3                            | 5                                       | 20                      | 8                 | 1.9                                              |
| 15  | 2                            | 6.5                                     | 27.5                    | 6.5               | 1.9                                              |
| 16  | 1                            | 5                                       | 35                      | 5                 | 0.8                                              |
| 17  | 1                            | 8                                       | 20                      | 5                 | 1.6                                              |
| 18  | 2                            | 6.5                                     | 27.5                    | 6.5               | 2                                                |
| 19  | 2                            | 6.5                                     | 27.5                    | 9.5               | 1.5                                              |
| 20  | 3                            | 5                                       | 35                      | 5                 | 2                                                |
| 21  | 2                            | 6.5                                     | 27.5                    | 6.5               | 2                                                |
| 22  | 2                            | 6.5                                     | 27.5                    | 6.5               | 2.2                                              |
| 23  | 3                            | 8                                       | 20                      | 5                 | 2.1                                              |
| 24  | 3                            | 8                                       | 20                      | 8                 | 2.1                                              |
| 25  | 1                            | 5                                       | 35                      | 8                 | 0.9                                              |
| 26  | 1                            | 8                                       | 20                      | 8                 | 1.6                                              |
| 27  | 2                            | 6.5                                     | 27.5                    | 3.5               | 1.4                                              |
| 28  | 1                            | 8                                       | 35                      | 5                 | 1.6                                              |
| 29  | 3                            | 5                                       | 35                      | 8                 | 2.2                                              |
| 30  | 2                            | 6.5                                     | 12.5                    | 6.5               | 1.4                                              |

4

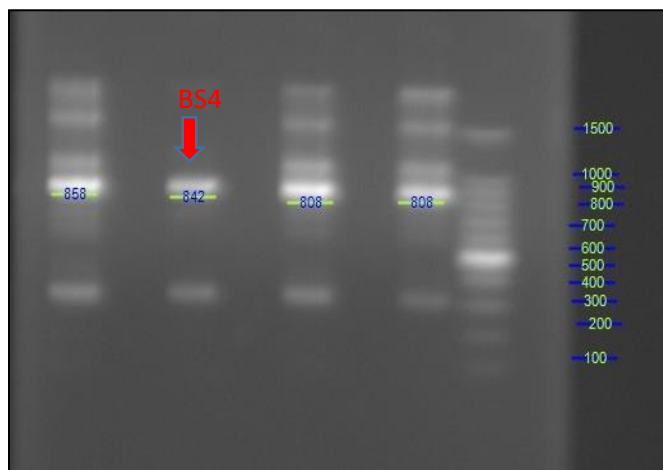

Figure S1. Screening of the RhlAB gene with lane 3 representing the strain BS4. Amplification of 842 bp fragment was observed using the primers *rhlABf* and *rhlABr*. From right Lane 1: Molecular marker, Lane 2: LBS2, Lane 3:BS2, Lane 4: BS4, Lane 5: BS24

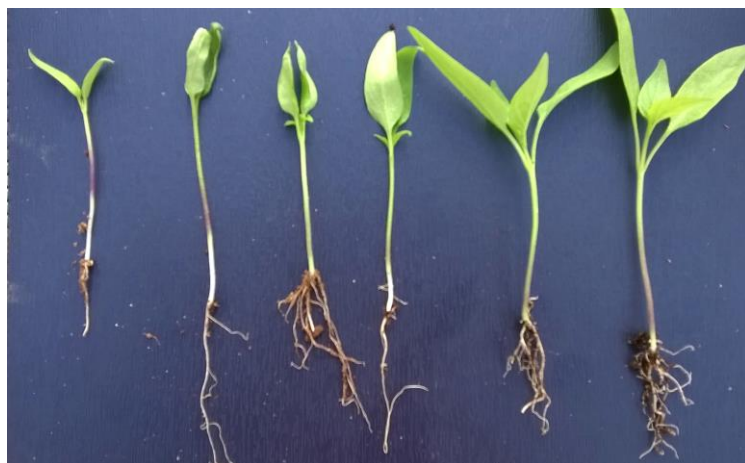

Figure S2. Photograph of 15-day-old red pepper seedlings under different treatments (no germination was observed in crude oil-contaminated soil with no amendments, and the seeds had a normal 97% germination rate under normal conditions). From right to left, plants are arranged as CS+NS, TS+NS, CS+NS+RPB, CS+RPB, TS+RPB, and TS+NS+RPB. CS refers to contaminated soil, NS normal soil, TS rhamnolipid-treated soil and RPB rhamnolipid-producing bacteria (*Shewanella* sp. BS4).
